# Supplementary material for: A helical polypyrrole nanotube interwoven zeolitic imidazolate framework and its derivative as an oxygen electrocatalyst
Source: Royal Society of Chemistry journal article supplement (doi:10.1039/d2cc03835h), 2022-01-01
Supplement: d2cc03835h1.pdf [file d2cc03835h1.pdf]

Electronic Supplementary Information (ESI) for Chem. Commun.

**A Helical Polypyrrole Nanotube interwoven Zeolitic Imidazolate Framework and Its Derivative as Oxygen Electrocatalysts**

Zijia Bao,<sup>a</sup> Yanzhi Wang,<sup>a</sup> Mengke Shi,<sup>a</sup> Xinyue Wang,<sup>a</sup> Zuozhong Liang,<sup>a</sup> Zhehao Huang,<sup>b</sup> Wei Zhang,<sup>a</sup> Rui Cao,<sup>a</sup> Haoquan Zheng<sup>\*a</sup>

<sup>a</sup>Key Laboratory of Applied Surface and Colloid Chemistry, Ministry of Education, School of Chemistry and Chemical Engineering, Shaanxi Normal University, Xi'an 710119, China.

<sup>b</sup>Department of Materials and Environmental Chemistry, Stockholm University, Stockholm SE-106 91, Sweden

Correspondence Email: [zhenghaoquan@snnu.edu.cn](mailto:zhenghaoquan@snnu.edu.cn)

## 1. Experimental section

### 1.1 Materials

L-glutamic acid (L-Glu, 99%), acetone (99.7%), stearyl chloride (98%), pyrrole (99%), ammonium persulfate (APS, 99%),  $\text{Co}(\text{NO})_3 \cdot 6\text{H}_2\text{O}$  (AR, 99%), 2-methylimidazole (AR, 99%), KOH (AR, 95%),  $\text{Zn}(\text{CH}_3\text{COO})_2 \cdot 2\text{H}_2\text{O}$  (AR, 99%) and ammonium persulfate (APS, 99%) were purchased from the Energy Chemical. NaOH (AR, 96%), HCl (36.0 ~ 38.0%), petroleum ether (AR), Methanol (AR, 99.5%) and Ethanol (AR, 99.7%) were purchased from Sinopharm Group Chemical Reagent Co., Ltd. All chemicals were used without further purification.

### 1.2 Preparation of chiral *N*-stearyl-glutamic acid ( $\text{C}_{18}\text{-L-Glu}$ )

Typically, 3.53 g of L-glutamic acid and 1.92 g of NaOH were dissolved in the mixed solution of 14 mL of deionized water (DIW) and 12 mL of acetone, keep the pH at 12. Then, 6.05 g of stearyl chloride and 10 mL of NaOH solution ( $0.2 \text{ mol L}^{-1}$ ) were added slowly into the solution mentioned above and keep pH at 12 for 1 hour. Add HCl dropwise to the solution and adjust the pH=1 to obtain the carboxylic acid surfactant. Wash the obtained solid with DIW till pH=7. Then wash 5 times with the petroleum ether solvent and drying in the freeze dryer for 12 h to obtain  $\text{C}_{18}\text{-L-Glu}$ .

### 1.3 Synthesis of HPPy.

Typically, 0.0245 g of  $\text{C}_{18}\text{-L-Glu}$  was dissolved in 12.88 mL of methanol, stir 30 min to fully dissolve the surfactant. 166  $\mu\text{L}$  pyrrole and 60 mL DIW were added into the above solution. After stirring 10 min, 1.2 mL of pre-cooled ( $0\sim 5 \text{ }^\circ\text{C}$ ) ammonium persulfate (APS) solution (containing 0.548 g APS) was added. Keep stirring 30 min, after filtrating and washing with DIW and ethanol, black solid named HPPy was obtained by drying at  $60 \text{ }^\circ\text{C}$  in the oven for 12 h. CCNT was obtained by pyrolyzing HPPy at  $900 \text{ }^\circ\text{C}$  for 3 h with the heating rate and cooling rate at  $2 \text{ }^\circ\text{C min}^{-1}$  under Ar atmosphere.

### 1.4 Synthesis of Co-NCCN.

Firstly, 30 mg of HPPy was uniformly distributed in 30 mL of methanol by ultrasonic crusher. Then, 5 mL of methanol containing 1 mmol  $\text{Co}(\text{NO})_3 \cdot 6\text{H}_2\text{O}$  was added in the above solution. After stirring 10 min, 25 mL of methanol with 4 mmol 2-methylimidazole was poured into the above solution. After stirring 1 hour, the mixture was aging for 24 h. The obtained deep purple powder was collected by the centrifugation (10000 rpm, 3 min) and washed with methanol for 3 times, named HPPy/ZIF. The 50 mg of HPPy/ZIF powder was weighted and transfer to a quartz boat and carbonized in a tubular furnace under Ar atmosphere. Ar was blown 30 min before heating to remove the air in the tube, and heated at  $900 \text{ }^\circ\text{C}$  for 3 h with the heating rate and cooling rate at  $2 \text{ }^\circ\text{C min}^{-1}$ . The obtained black powder was named Co-NCCN. Co-NC was synthesized by the same method without HPPy. Co-NC-2 was obtained with the same method, only

replaced the HPPy to the MWCNT. Physical mixture of HPPy and ZIF with the mass ratio of 1: 1 to obtain HPPy+ZIF, the HPPy+ZIF was pyrolyzing at the same condition to obtain Co-NC-3.

### ***1.5 Characterization***

The morphology of the materials was characterized on a scanning electron microscopy (SEM, Hitachi SU8020) at an accelerating voltage of 5 kV and a transmission electron microscope (TEM, JEOL JEM-2100) with a field emission gun operating at 200 kV. EDS analysis was conducted on an AMETEK Materials Analysis EDX equipped on the TEM. The diffuse reflectance circular dichroism (DR-CD) signals were collected with a JASCO J-1500 circular dichroism spectrophotometer. Powder X-ray diffraction (PXRD) patterns of the materials were obtained on an X-ray diffractometer (Bruker, D8 Advance, Cu  $K\alpha$ ,  $\lambda = 1.5406 \text{ \AA}$ , 40 kV/40 mA). Brunauer-Emmett-Teller (BET) specific surface area was measured in Micromeritics ASAP 2020. X-ray photoelectron spectroscopic (XPS) spectra were collected by a Kratos AXIS ULTRA XPS. The Raman spectra were measured with a Raman spectrometer (Renishaw, in Via Reflex).

### ***1.6 Electrochemical measurement***

All of electrochemical tests are conducted on the CHI 660E (CH Instruments) electrochemical workstation and a Pine Modulated Speed Rotator (Pine Research Instrumentation, Inc.) at 30 °C. All ORR and OER performance tests are evaluated by a three-electrode system. The counter electrode is a graphite rod, and the reference electrode is a saturated Ag/AgCl electrode.

The details of the ORR electrochemical tests are as follows: the working electrode is a rotating disk electrode (RDE) (5 mm, 0.196 cm<sup>2</sup>) or a rotating ring disk electrode (RRDE) (5.61 mm, 0.247 cm<sup>2</sup>). The catalyst ink is consisted of 2 mg catalyst, 10  $\mu\text{L}$  of Nafion solution (5 wt%, DuPont), 333  $\mu\text{L}$  of deionized water, and 166  $\mu\text{L}$  of isopropanol. The mixture was ultrasonicated for about 1 h to prepare a homogeneous catalyst ink. Then, 20  $\mu\text{L}$  catalyst ink was evenly dropped on the rotating disk electrode (RDE), the catalyst load is 0.08 mg. The cyclic voltammetry (CV) test is carried out in 0.1 M KOH filled with Ar or O<sub>2</sub> at the scan rate of 50 mV·s<sup>-1</sup> after 15 cycles activation at the scan rate of 100 mV·s<sup>-1</sup>. The linear sweep voltammetry (LSV) tests are carried out in 0.1 M KOH O<sub>2</sub>-saturated solution at a rotational speed range of 400 to 1600 rpm at the scan rate of 5 mV·s<sup>-1</sup> after 100% IR compensation. The  $j$ - $t$  chronoamperometric responses were measured at 0.664 V (versus to RHE). The electrochemical impedance spectroscopy (EIS) spectra were tested in 0.1 M KOH O<sub>2</sub>-saturated solution at a rotational speed of 1600 rpm at 0.664 V (versus to RHE).

The details of the OER electrochemical tests are as follows, the working electrode is a glassy carbon (GC) electrode (3 mm, 0.07 cm<sup>2</sup>). The catalyst ink is consisted of 2 mg catalyst, 10  $\mu\text{L}$  of Nafion solution (5 wt%, DuPont), 333  $\mu\text{L}$  of deionized water, and 166  $\mu\text{L}$  of isopropanol. The mixture was ultrasonicated for about 1 h to prepare a homogeneous catalyst ink. Then, 6  $\mu\text{L}$  ink was evenly dropped on the glassy carbon

(GC) electrode, the catalyst load is 0.024 mg. The LSV test is tested in 0.1 M KOH at the scan rate of 5 mV·s<sup>-1</sup> after 100% IR compensation.

ORR measurement: The potentials corresponding to the reversible hydrogen electrode (RHE) electrode was calculated with the following equation:

$$E_{RHE} = E_{Ag/AgCl} + (0.197 + 0.0591 \times pH)$$

The number of electron transfers (n) tested with RDE is calculated by the Koutecky-Levich (K-L) formula:

$$\frac{1}{j} = \frac{1}{j_l} + \frac{1}{j_k} = \frac{1}{B\omega^{1/2}} + \frac{1}{j_k}$$

$j$  is the measured current density;  $j_l$  is the diffusion current density;  $j_k$  is the dynamic current density;  $\omega$  is the rotational speed (rpm); B can be confirmed by the Koutecky-Levich (K-L) formula:

$$B = 0.2nFC_0(D_0)^{2/3}\nu^{-1/6}$$

Where F is the Faraday constant (96485 C mol<sup>-1</sup>);  $C_0$  is the concentration of O<sub>2</sub> in 0.1 M KOH (1.2 × 10<sup>-6</sup> mol cm<sup>-3</sup>);  $D_0$  is the diffusion coefficient of O<sub>2</sub> in 0.1 M KOH (1.9 × 10<sup>-5</sup> cm<sup>2</sup> s<sup>-1</sup>);  $\nu$  is the viscosity of 0.1 M KOH (0.1 cm<sup>2</sup> s<sup>-1</sup>).

The number of electron transfers (n) could also be calculated by the tests with RRDE by the following equation:

$$n = \frac{4I_d}{I_d + \frac{I_r}{N}}$$

where  $I_d$  is the disk current of RRDE;  $I_r$  is the ring current; and N is the ring current collection efficiency, which was determined to be ~ 0.37 with the LSV measurement in K<sub>3</sub>Fe[CN]<sub>6</sub> solution. The yield percentage (H<sub>2</sub>O<sub>2</sub>%) can be calculated with the following equation:

$$H_2O_2\% = 200 \frac{\frac{I_r}{N}}{I_d + \frac{I_r}{N}}$$

OER measurement: Calculate the potential corresponding to the reversible hydrogen electrode (RHE) electrode by the following formula:

$$E_{RHE} = E_{Ag/AgCl} + (0.197 + 0.059 \times pH)$$

The overpotential ( $\eta$ ) is calculated by the following formula:

$$\eta = E_{RHE} - 1.23$$

Zn-air battery performance test: All zinc-air battery tests are performed on CHI 660E electrochemical workstation at room temperature. The battery consists of a

polished zinc foil with a diameter of 15 mm and a thickness of 0.25 mm as the anode, 6.0 M KOH and 0.2 M Zn(OAc)<sub>2</sub> · 2H<sub>2</sub>O electrolytes, and a carbon cloth/gas diffusion layer (CC/GDL) coated with catalyst as the cathode.

Preparation of the air cathode: The catalyst ink is consisted of 5 mg catalyst, 950 μL of ethanol, and 50 μL of Nafion aqueous solution (5 wt% DuPont). The mixture was ultrasonicated for about 1 h to prepare a homogeneous catalyst ink. Spread 450 μL of the catalyst ink dropwise on the carbon cloth/gas diffusion layer (CC/GDL). The load of the catalyst is about 2 mg cm<sup>-2</sup>. The carbon cloth (1.5 cm × 1.5 cm) is attached to the gas diffusion layer (1.8 cm × 1.8 cm) by thermo-pressing.

The discharge characteristic curve is tested at a current density of 20 mA cm<sup>-2</sup>. The long-term charge-discharge cycling curve was tested with flow cell at 2 mA cm<sup>-2</sup>. Each of the charge and discharge cycle is consisted of 10 min charge process and 10 min discharge process, and the current density is 2 mA cm<sup>-2</sup>. The dynamic charge and discharge polarization curves were tested by LSV at the scan rate of 10 mV s<sup>-1</sup>.

**Table S1.** Electrochemical ORR activities and Zn-air battery performance of Co-based electrocatalysts in this work and other reported works.

| ORR                                       |                 |                  | Zn-air battery                                                    |                          | Ref.                                                                             |
|-------------------------------------------|-----------------|------------------|-------------------------------------------------------------------|--------------------------|----------------------------------------------------------------------------------|
| Catalyst                                  | Electrolyte     | $E_{1/2}$ vs RHE | Specific capacity (mAh g <sup>-1</sup> )@j (mA cm <sup>-2</sup> ) | Open circuit voltage (V) |                                                                                  |
| <b>Co-NCCN</b>                            | <b>0.1M KOH</b> | <b>850 mV</b>    | <b>797.6@20</b>                                                   | <b>1.50</b>              | <b>This work</b>                                                                 |
| Co-N <sub>x</sub> -C                      | 0.1M KOH        | 780 mV           | 749.4@20                                                          | 1.44                     | <i>Adv. Mater.</i> , 2017, <b>29</b> , 1703185. <sup>1</sup>                     |
| 3D Co/N-C                                 | 0.1M KOH        | 840 mV           | --                                                                | --                       | <i>Chem. Eng. J.</i> , 2022, <b>433</b> , 134500. <sup>2</sup>                   |
| Co <sub>4</sub> N                         | 0.1M KOH        | 840 mV           | 794.1@10                                                          | 1.46                     | <i>Energy Storage Mater.</i> , 2022, <b>46</b> , 553-562. <sup>3</sup>           |
| NC-Co SA                                  | 0.1M KOH        | 870 mV           | --                                                                | --                       | <i>ACS Catal.</i> , 2018, <b>8</b> , 8961-8969. <sup>4</sup>                     |
| Co <sub>3</sub> O <sub>4-x</sub> /NG      | 0.1M KOH        | 840 mV           | 700.6@10                                                          | 1.49                     | <i>Appl. Catal. B</i> , 2020, <b>278</b> , 119300. <sup>5</sup>                  |
| BCN/rGO-Co                                | 0.1M KOH        | 850 mV           | 765.0@10                                                          | 1.46                     | <i>ACS Appl. Mater. Interfaces</i> , 2022, <b>14</b> , 17249-17258. <sup>6</sup> |
| Co/CoO@NSC                                | 0.1M KOH        | 835 mV           | 759.7@10                                                          | 1.51                     | <i>J. Energy Chem.</i> , 2022, <b>64</b> , 385-394 <sup>7</sup>                  |
| CoZn-NC-700                               | 0.1M KOH        | 840 mV           | 578.0@10                                                          | 1.42                     | <i>Adv. Funct. Mater.</i> , 2017, <b>27</b> , 1700795. <sup>8</sup>              |
| Co-NC-AD                                  | 0.1M KOH        | 860 mV           | 808.0@5                                                           | 1.45                     | <i>J. Energy Chem.</i> , 2022, <b>70</b> , 211-218. <sup>9</sup>                 |
| Co(OH) <sub>2</sub> /CoPt/N-CN            | 0.1M KOH        | 800 mV           | 682.0@20                                                          | --                       | <i>ACS Appl. Mater. Interfaces</i> , 2019, <b>11</b> , 4983-4994. <sup>10</sup>  |
| Co@Co <sub>3</sub> O <sub>4</sub> @NC-900 | 0.1M KOH        | 800 mV           | 685.0@5                                                           | --                       | <i>J. Mater. Chem. A</i> , 2018, <b>6</b> , 1443-1453. <sup>11</sup>             |

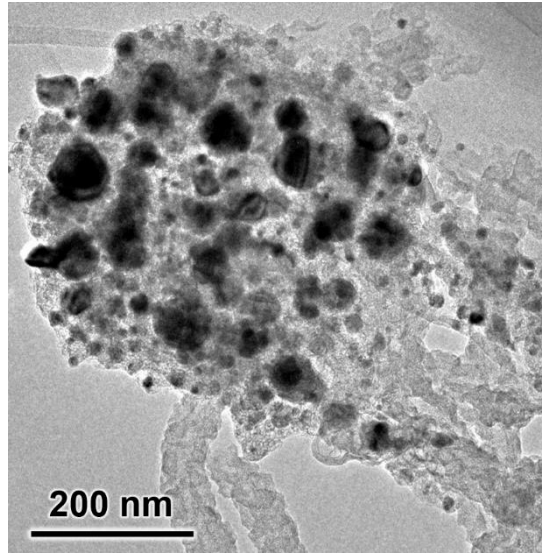

**Fig. S1.** TEM image of Co-NCCN.

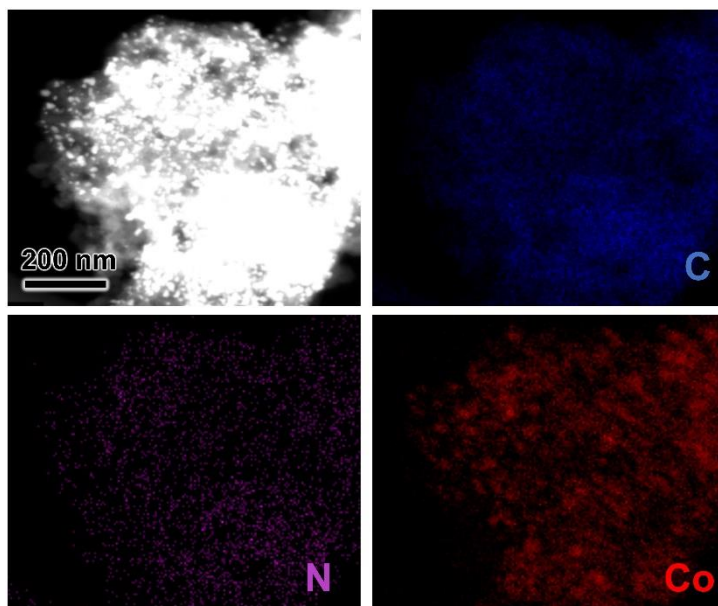

**Fig. S2.** The HAADF-STEM image and corresponding element mapping images of Co-NCCN.



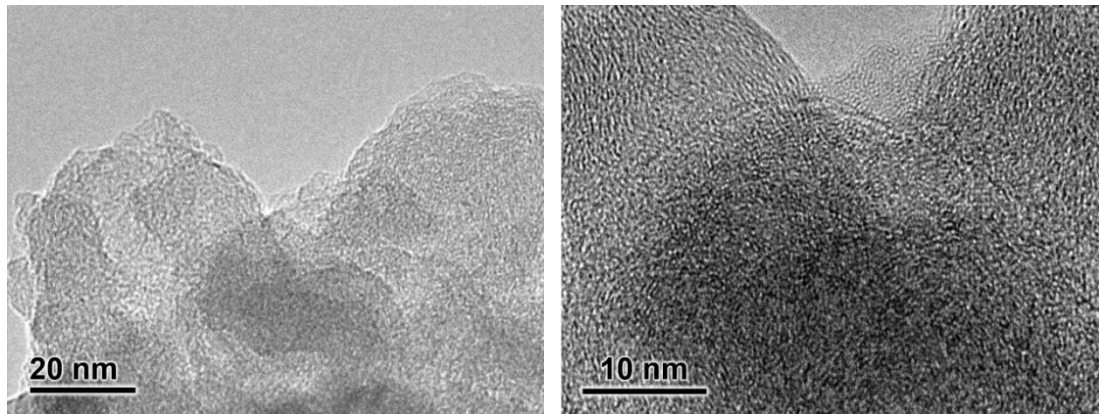

**Fig. S3.** TEM images of the interface of helical carbonaceous nanotubes and Co-NC derived from ZIF-67 in Co-NCCN.

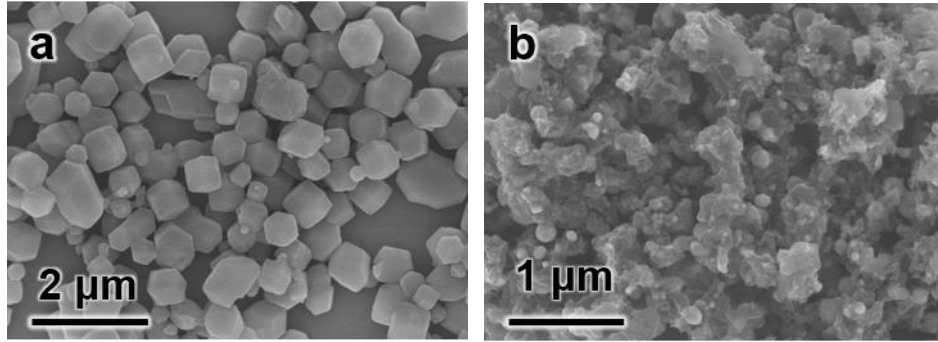

**Fig. S4.** SEM images of ZIF-67 (a) and Co-NC (b).

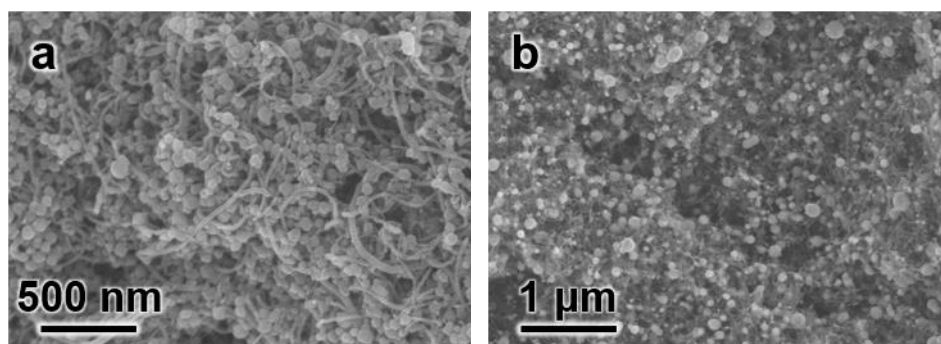

**Fig. S5.** SEM images of MWCNT/ZIF (a) and Co-NC-2 (b).

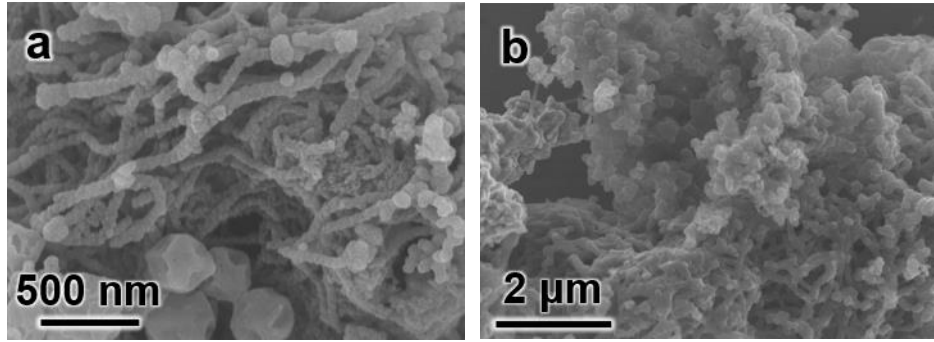

**Fig. S6.** SEM images of the physical mixture of HPPy+ZIF (a) and Co-NC-3 (b).

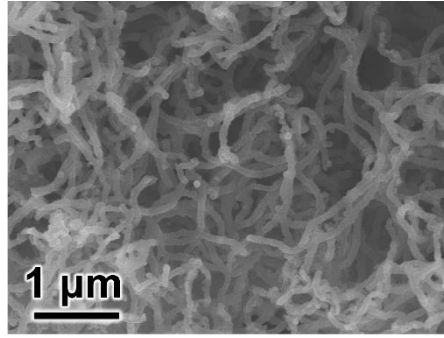

**Fig. S7.** SEM image of CCNT derived from HPPy.

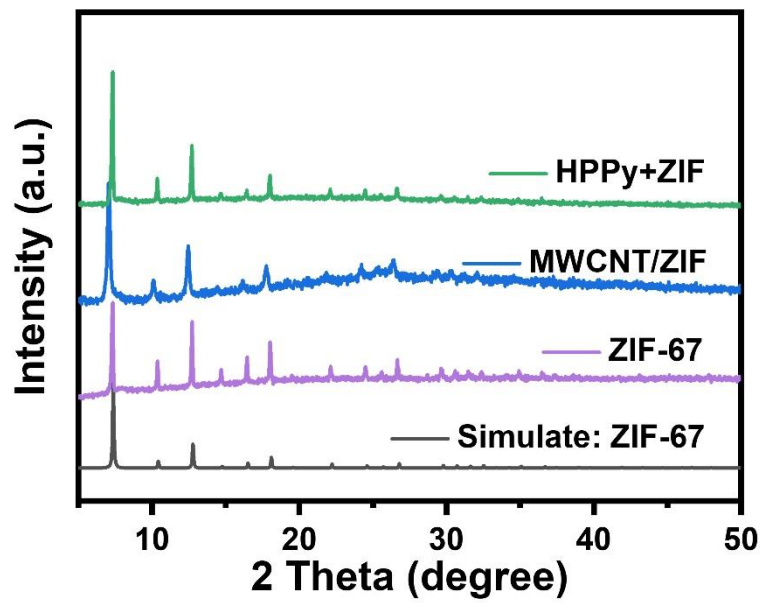

**Fig. S8.** PXRD of ZIF-67, MWCNT/ZIF, and HPPy+ZIF.

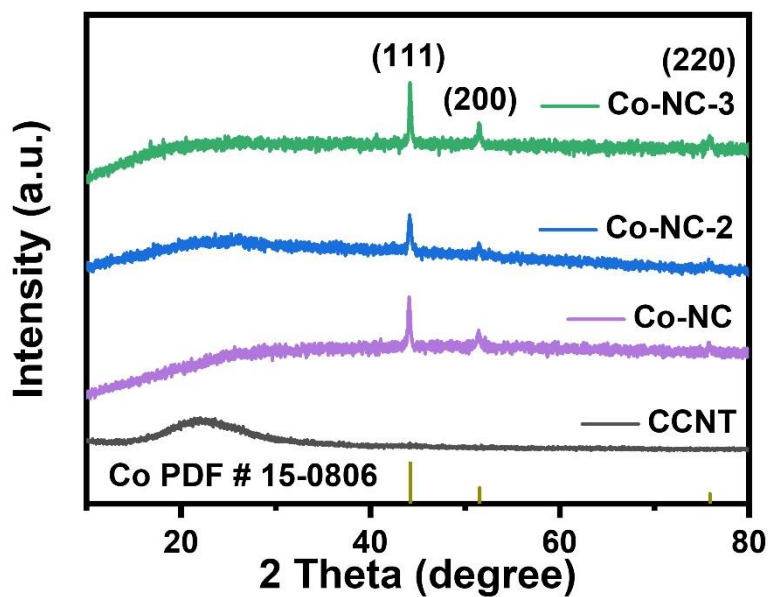

**Fig. S9.** PXRD of CCNT, Co-NC, Co-NC-2 and Co-NC-3.

After pyrolyzed at 900 °C under Ar atmosphere, the PXRD of the obtained Co-NC, Co-NC-2, and Co-NC-3 exhibit the diffraction peaks at 44.2°, 51.5° and 75.8°, which indexed to the {111}, {200} and {220} planes of Co (PDF#15-0806).

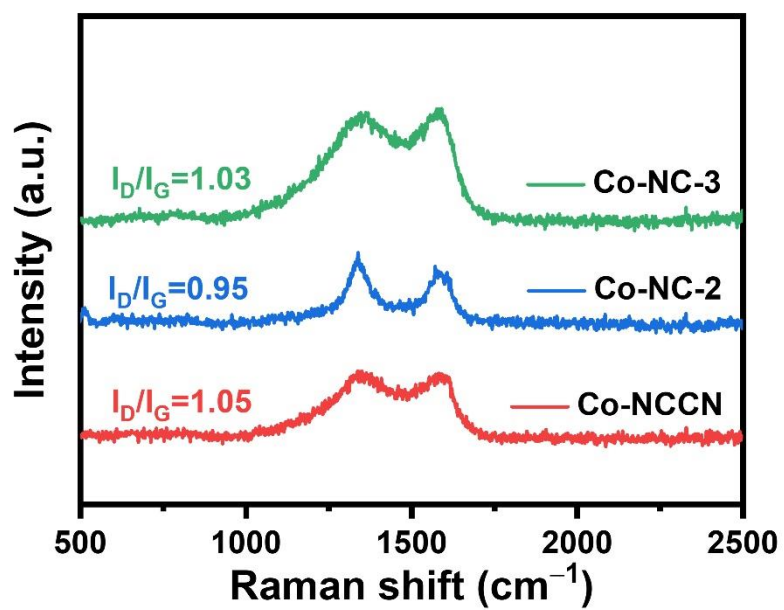

**Fig. S10.** Raman spectra of Co-NCCN, Co-NC-2, and Co-NC-3.



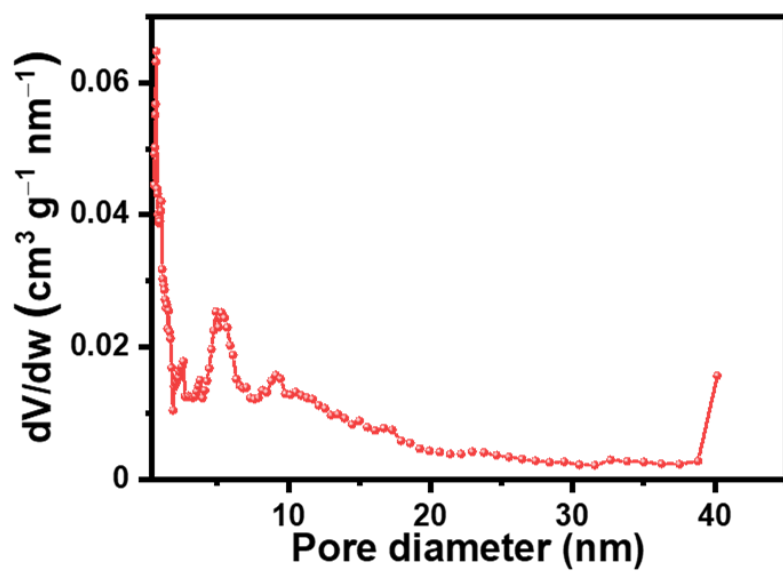

**Fig. S11.** The pore size distribution of Co-NCCN analyzed by the DFT model.

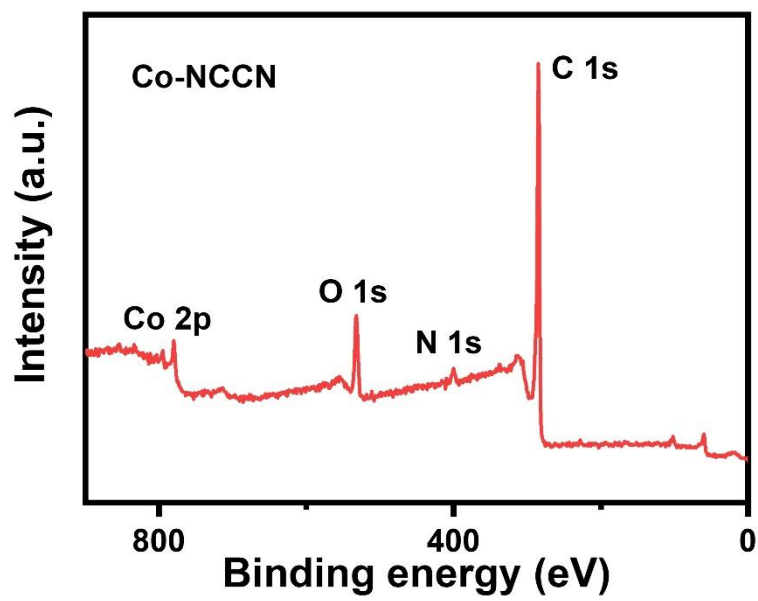

**Fig. S12.** XPS survey spectrum of Co-NCCN.

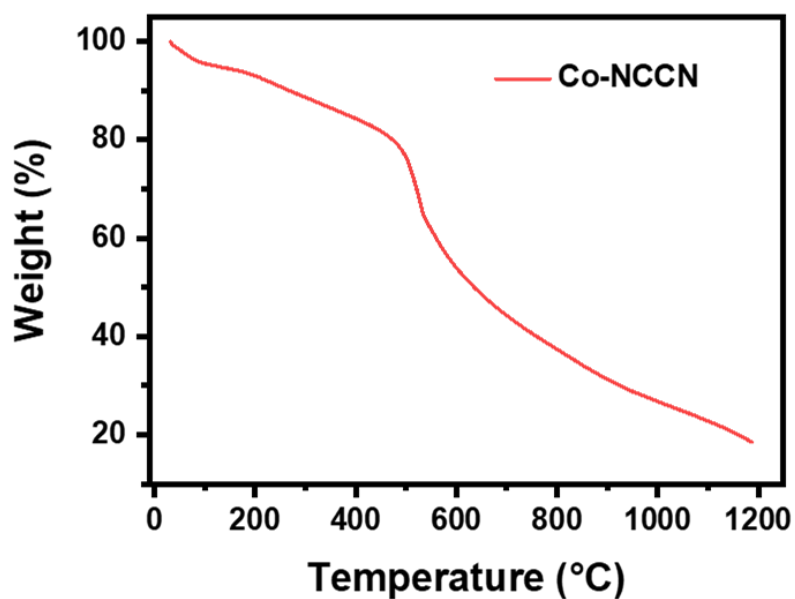

**Fig. S13.** Temperature dependent TGA of as-synthesized HPPy/ZIF-67 in Ar.

There is a weight loss of 20% below 500 °C due to the desorption of water and guest molecules. After reaching decomposition temperature of 500 °C, the weight loss was attributed to the collapse of the HPPy/ZIF-67 structure and carbonization under extreme thermal stress. After 700 °C, the weight loss is due to the transformation from defective carbon to graphitic carbon.

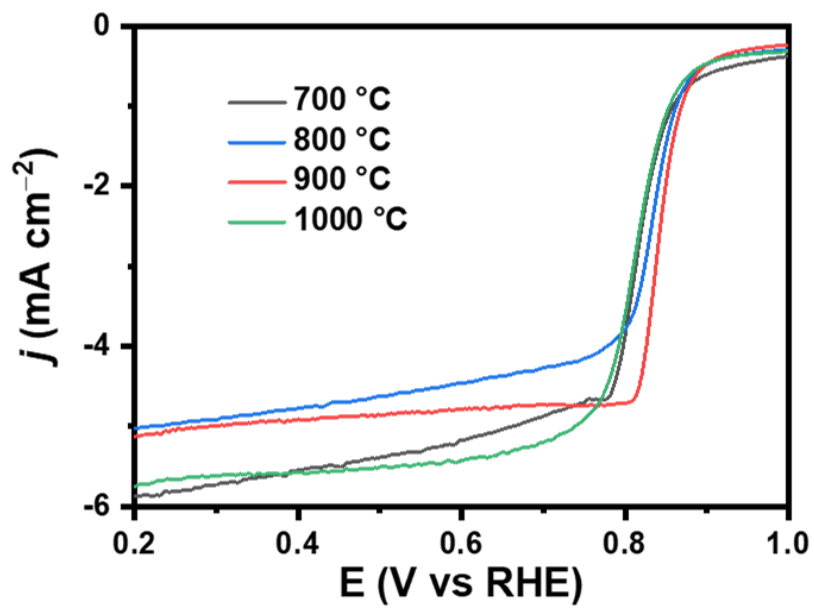

**Fig. S14.** LSV curves of Co-NCCN after calcined at different temperatures under Ar.

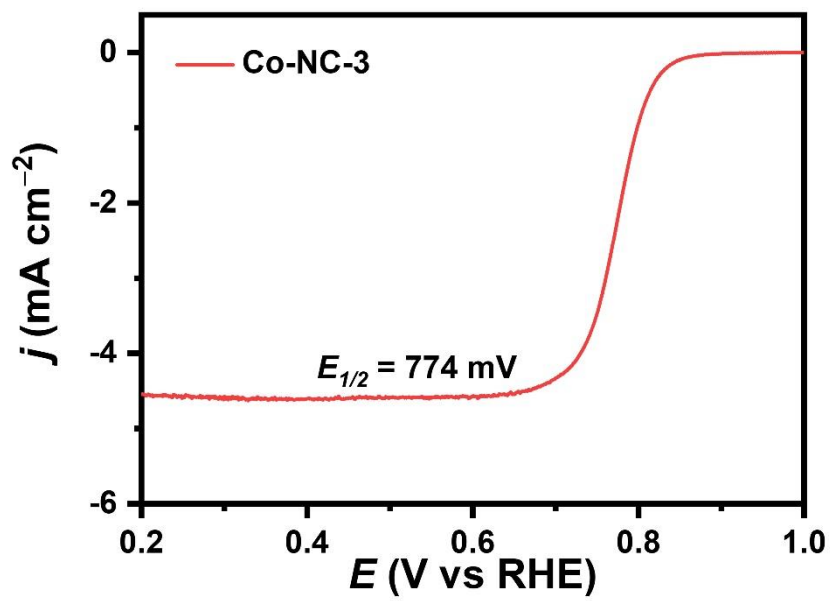

Fig. S15. LSV curve of Co-NC-3.

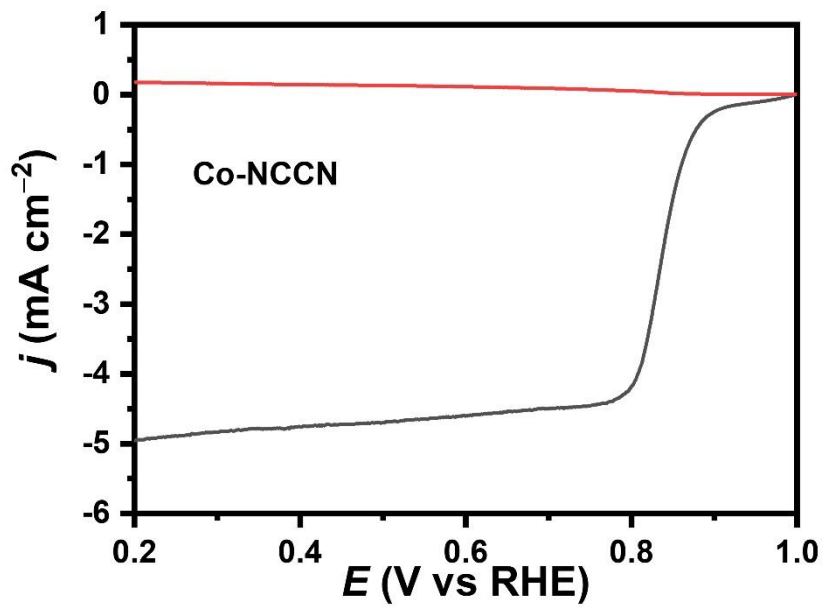

**Fig. S16.** LSV curves of Co-NCCN with RRDE.

LSV curves of Co-NCCN have been tested with rotating ring disk electrode (RRDE) in  $\text{O}_2$ -saturated 0.1 M KOH solution at 1600 rpm, the  $n$  of Co-NCCN is 3.74.

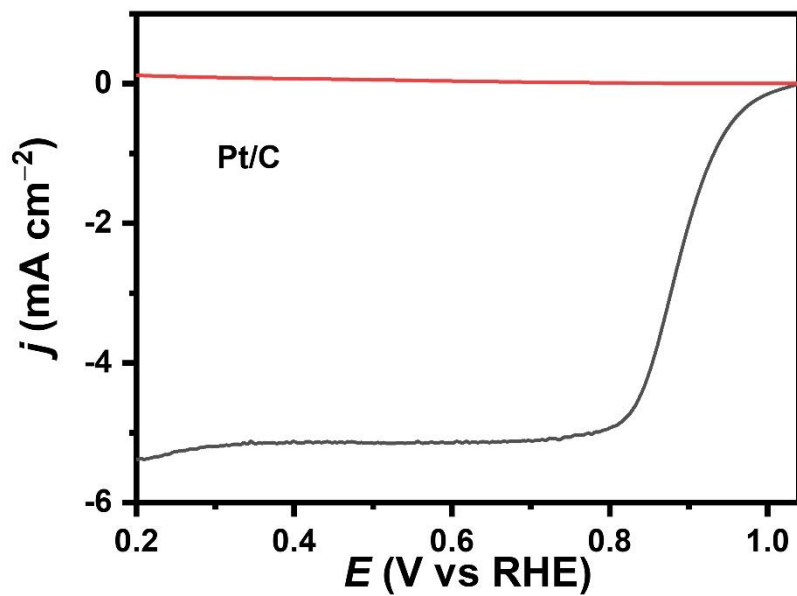

**Fig. S17.** LSV curves of commercial Pt/C with RRDE.

LSV curves of Co-NC Pt/C have been tested with RRDE in  $\text{O}_2$ -saturated 0.1 M KOH solution at 1600 rpm, the  $n$  of Pt/C is 3.9.

## References:

- 1 C. Tang, B. Wang, H.F. Wang and Q. Zhang, *Adv. Mater.*, 2017, **29**, 1703185.
- 2 R. Wang, H. Yang, N. Lu, S. Lei, D. Jia, Z. Wang, Z. Liu, X. Wu, H. Zheng, S. Ali, F. Ma and S. Peng, *Chem. Eng. J.*, 2022, **433**, 134500.
- 3 H. Yang, S. Gao, D. Rao and X. Yan, *Energy Storage Mater.*, 2022, **46**, 553-562.
- 4 W. Zang, A. Sumboja, Y. Ma, H. Zhang, Y. Wu, S. Wu, H. Wu, Z. Liu, C. Guan, J. Wang and S.J. Pennycook, *ACS Catal.*, 2018, **8**, 8961-8969.
- 5 J. Qin, Z. Liu, D. Wu and J. Yang, *Appl. Catal. B*, 2020, **278**, 119300.
- 6 L. Cao, Y. Wang, Q. Zhu, L. Fan, Y. Wu, Z. Li, S. Xiong and F. Gu, *ACS Appl. Mater. Interfaces*, 2022, **14**, 17249-17258.
- 7 D. Zhou, H. Fu, J. Long, K. Shen and X. Gou, *J. Energy Chem.*, 2022, **64**, 385-394.
- 8 B. Chen, X. He, F. Yin, H. Wang, D.-J. Liu, R. Shi, J. Chen and H. Yin, *Adv. Funct. Mater.*, 2017, **27**, 1700795.
- 9 Y. Feng, K. Song, W. Zhang, X. Zhou, S.J. Yoo, J.-G. Kim, S. Qiao, Y. Qi, X. Zou, Z. Chen, T. Qin, N. Yue, Z. Wang, D. Li and W. Zheng, *J. Energy Chem.*, 2022, **70**, 211-218.
- 10 K. Wang, W. Wu, Z. Tang, L. Li, S. Chen and N.M. Bedford, *ACS Appl. Mater. Interfaces*, 2019, **11**, 4983-4994.
- 11 Z. Guo, F. Wang, Y. Xia, J. Li, A.G. Tamirat, Y. Liu, L. Wang, Y. Wang and Y. Xia, *J. Mater. Chem. A*, 2018, **6**, 1443-1453.
